# Supplementary figures and images for: A Non‐Randomized Trial of In‐Person Versus Text/Telephone Screening, Brief Intervention and Referral to Treatment for Pregnant and Postpartum Women
Source: Atypon-hosted journal article supplement (doi:10.1176/appi.prcp.20210027), 2021-11-19

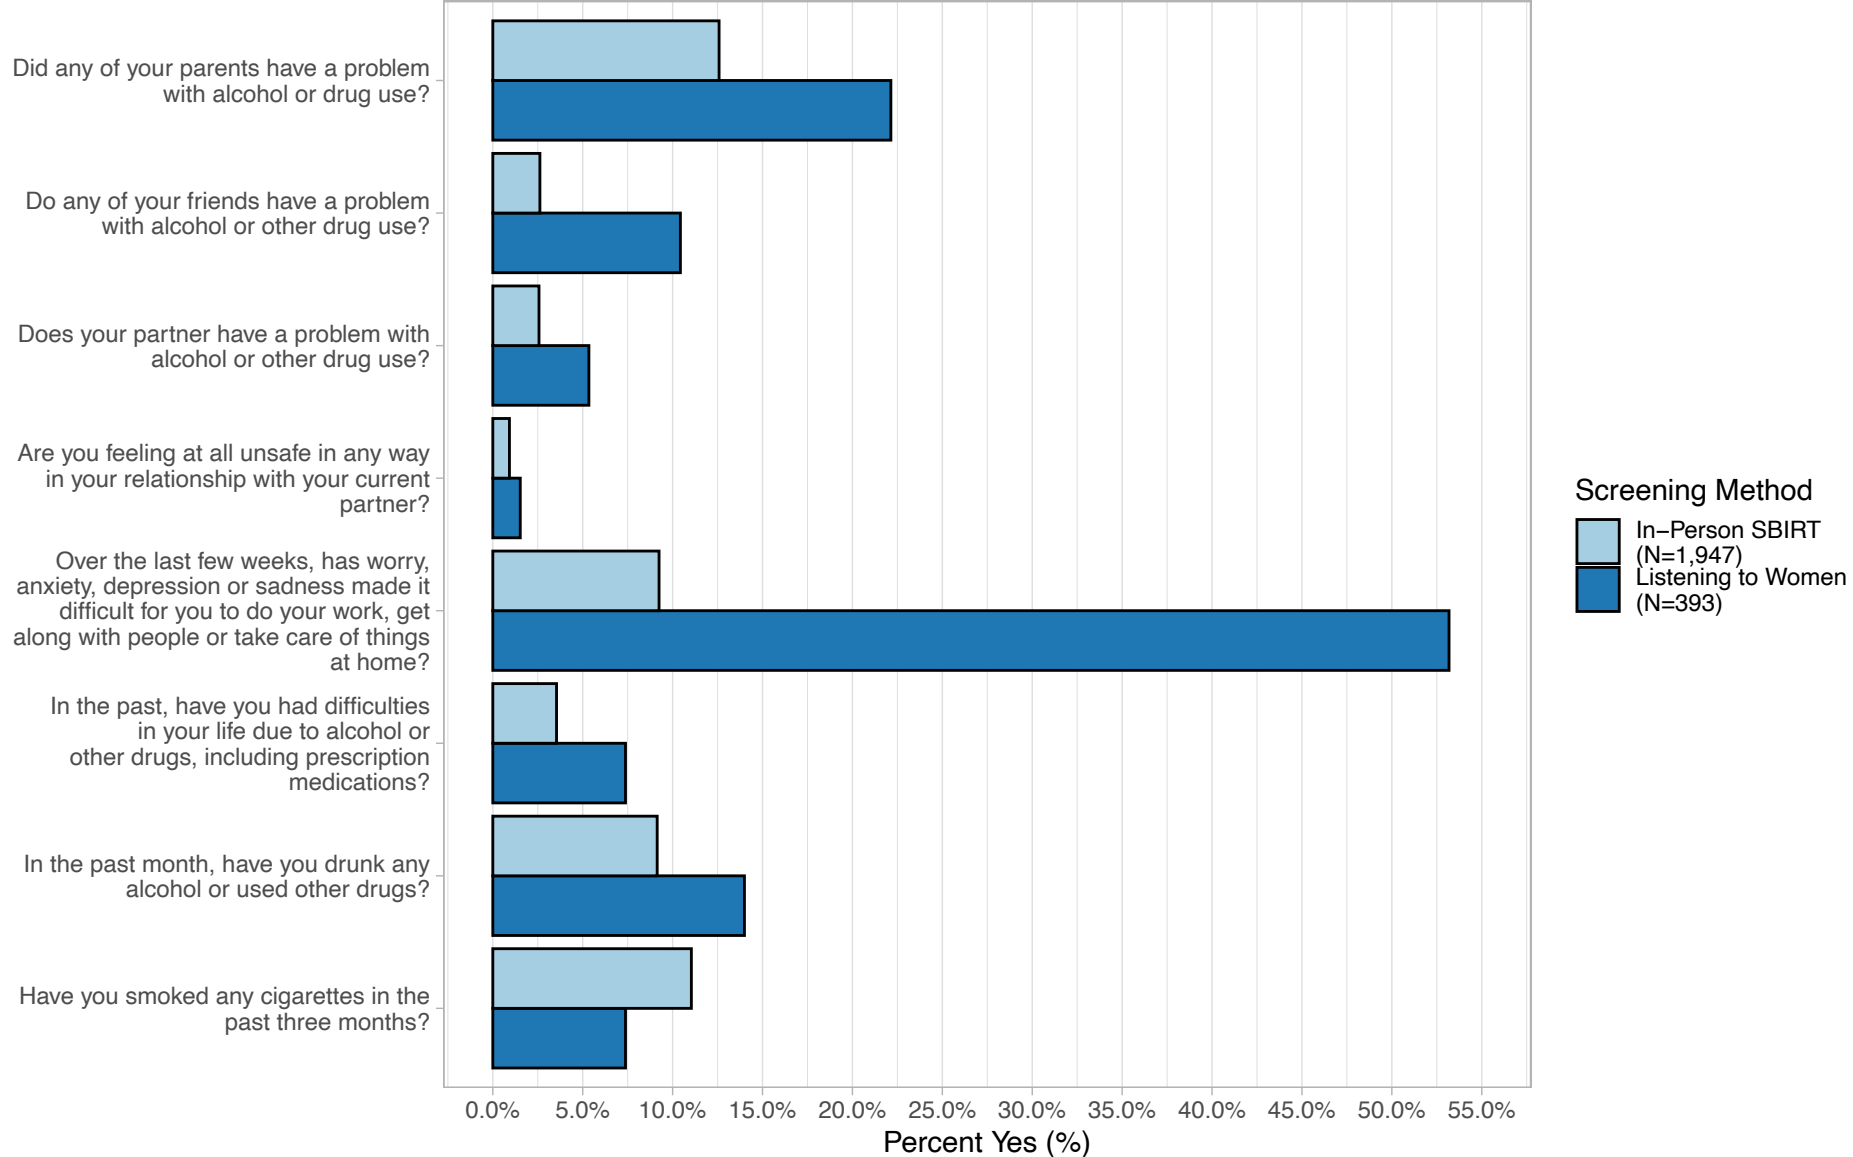

Supplement: rcp21037-sup-0003-fig_s1.pdf [file rcp21037-sup-0003-fig_s1.pdf]
